# Supplementary material
Source: PubMed Central journal article supplement (PMC9643338)

Fig.2F

p-I $\kappa$ K $\alpha$

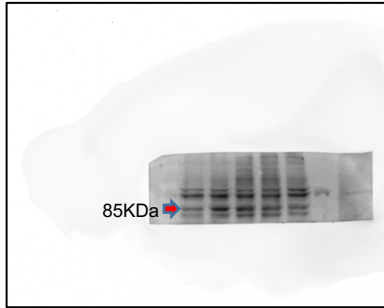

t-I $\kappa$ K $\alpha$

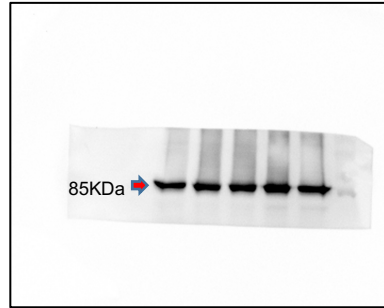

p-I $\kappa$ B $\alpha$

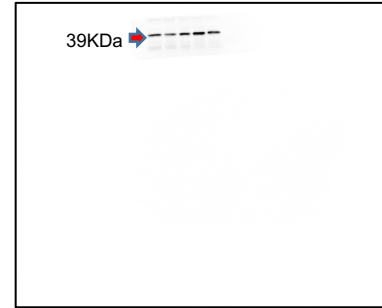

t-I $\kappa$ B $\alpha$

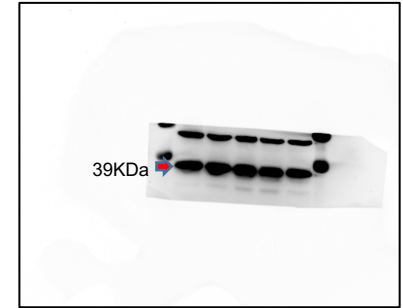

p-NF- $\kappa$ B

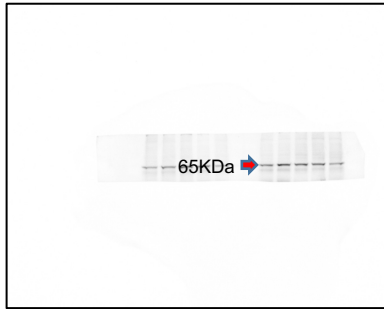

t-NF- $\kappa$ B

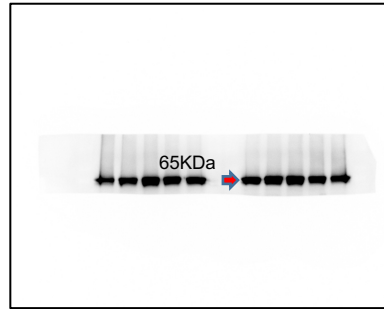

p-p38

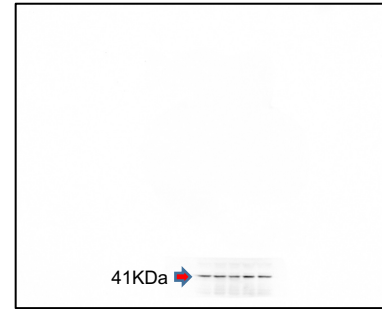

t-p38

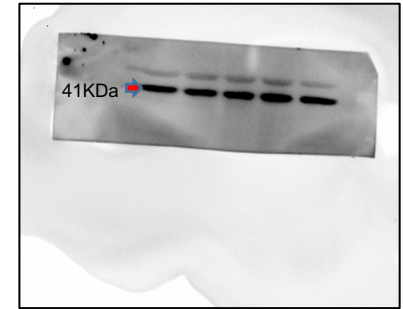

p-Erk

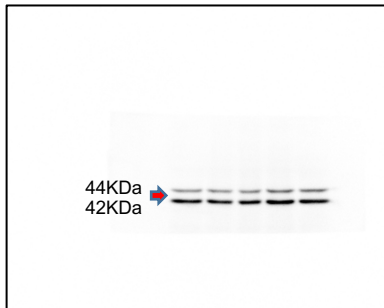

t-Erk

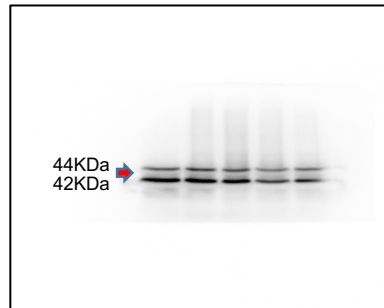

$\beta$ -Actin

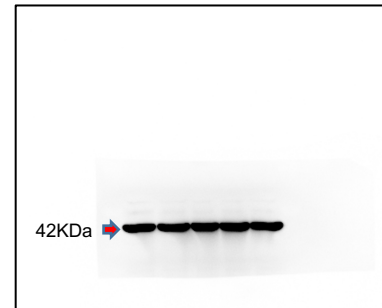

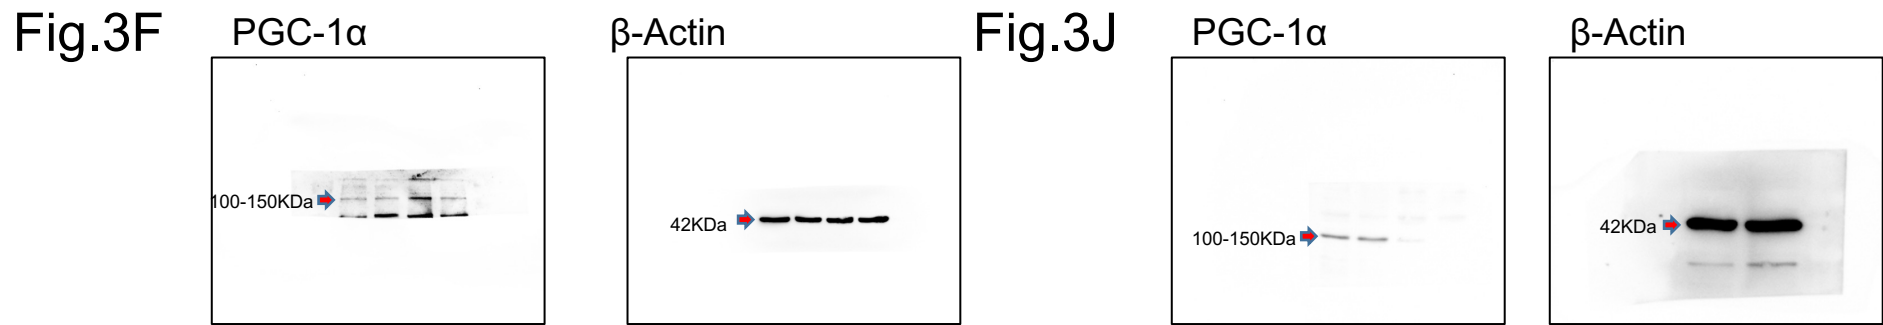

**Fig.3M**

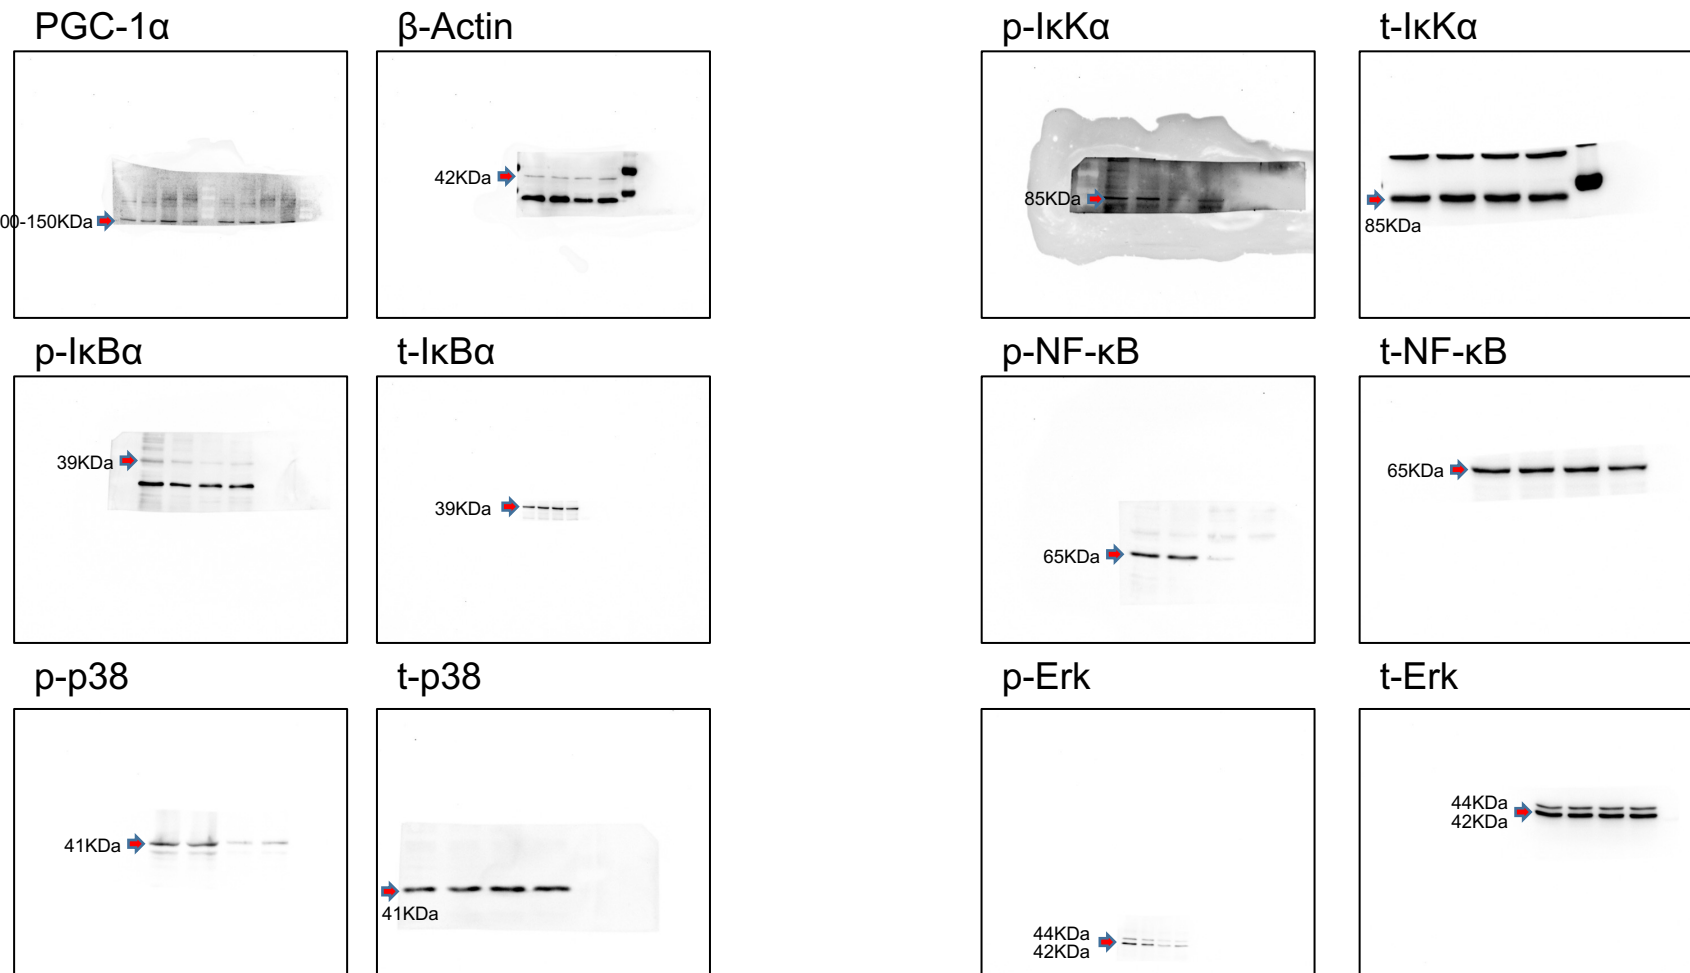

Fig.4C

Mfn-1

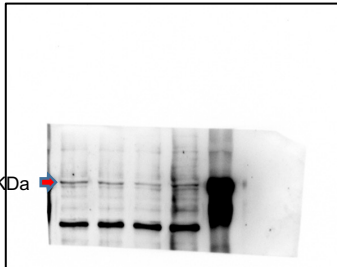

Mfn-2

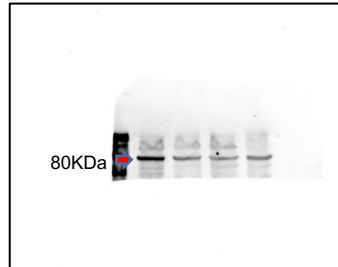

$\beta$ -Actin

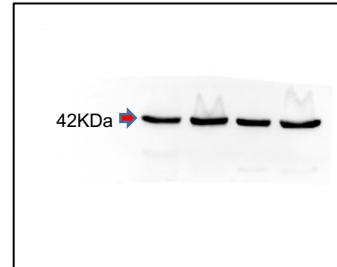

Fig.4K

p-I $\kappa$ B $\alpha$

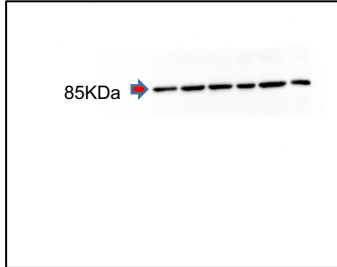

t-I $\kappa$ B $\alpha$

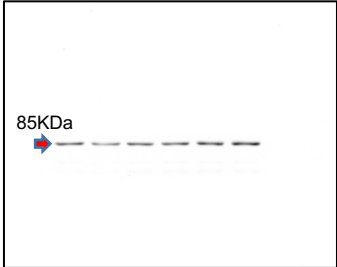

p-I $\kappa$ B $\beta$

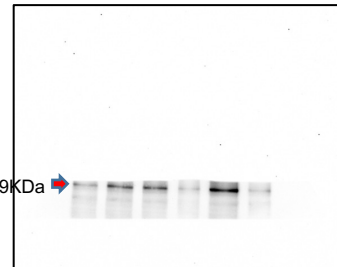

t-I $\kappa$ B $\alpha$

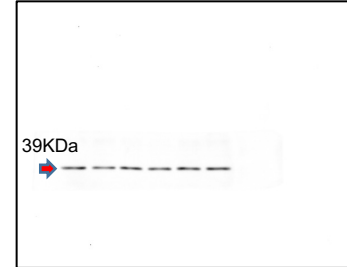

p-NF- $\kappa$ B

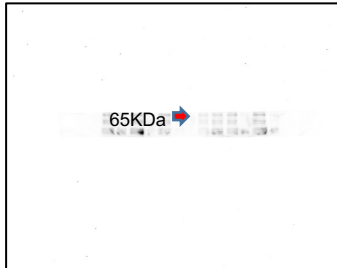

t-NF- $\kappa$ B

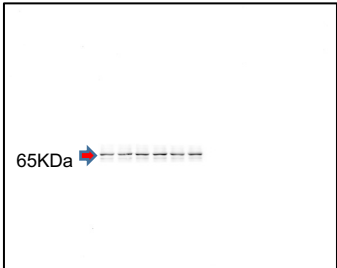

$\beta$ -Actin

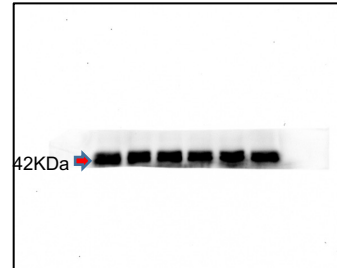

Fig.5G

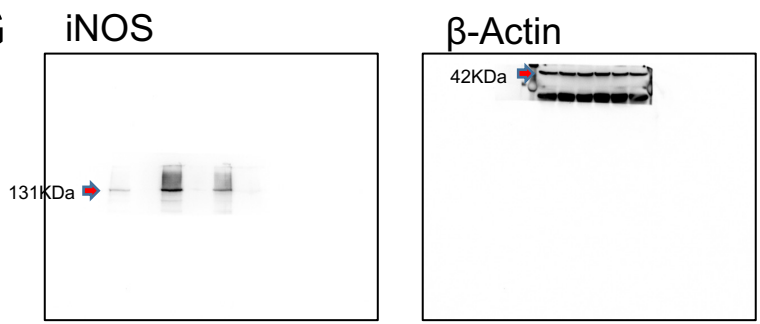

Fig.5H

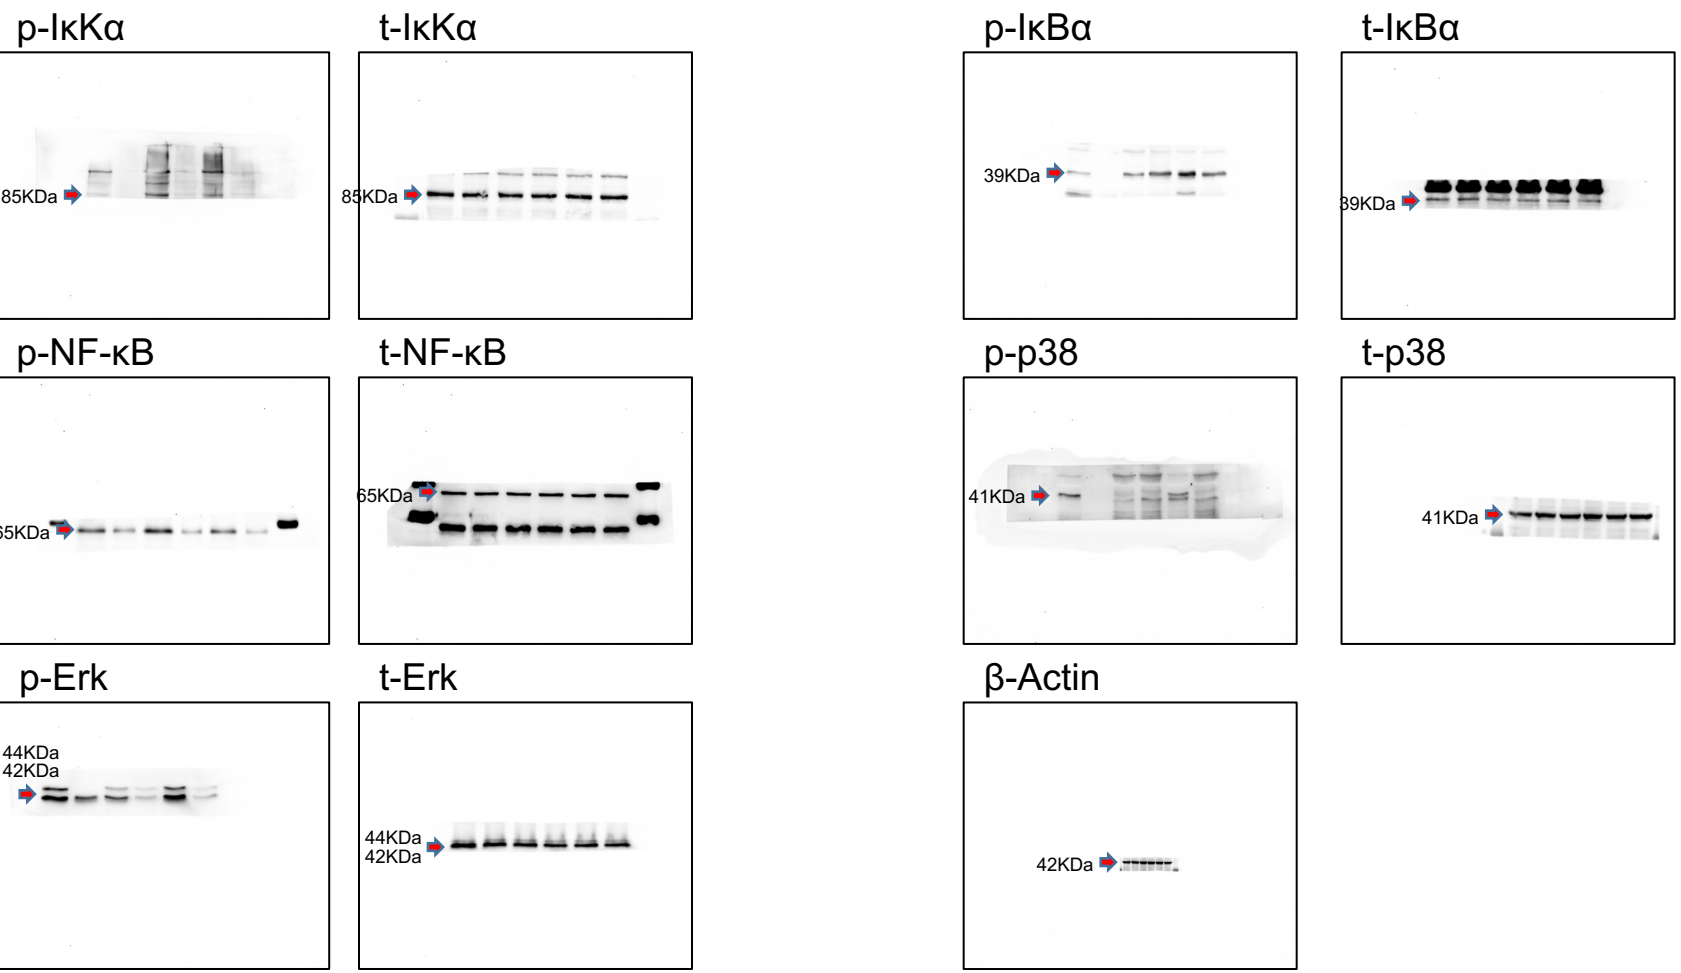

Supplement: mmc4.pdf [file mmc4.pdf]
